# Supplementary material for: Cobalt oxide nanoparticles induce oxidative stress and alter electromechanical function in rat ventricular myocytes
Source: PubMed Central journal article supplement (PMC7788732; doi:10.1186/s12989-020-00396-6), 2021-01-06

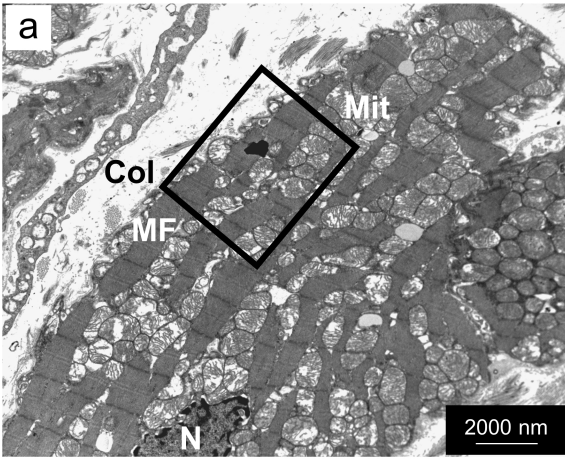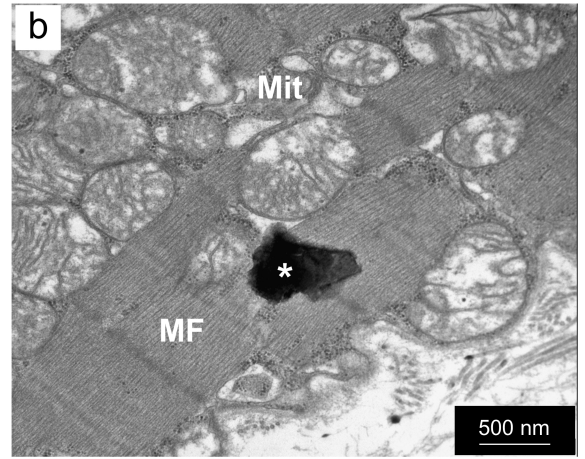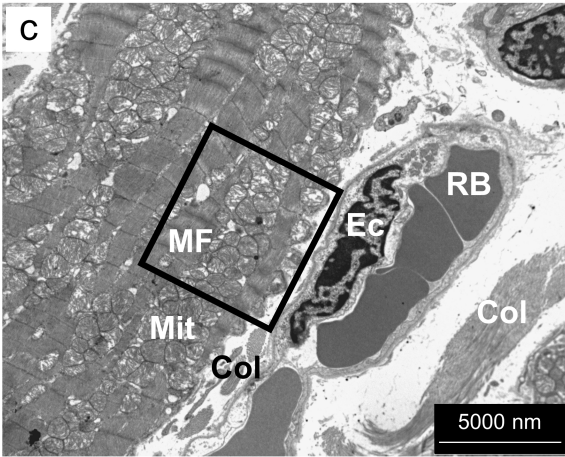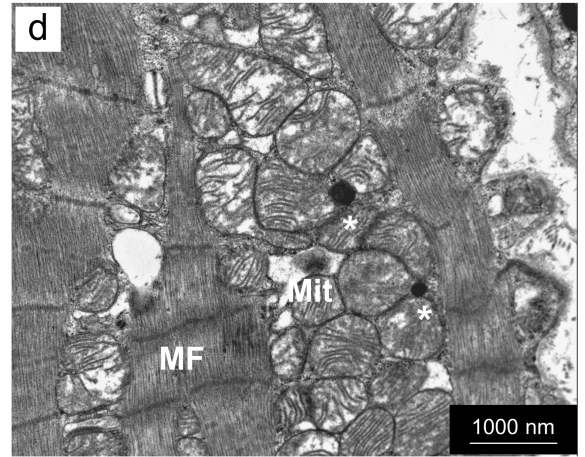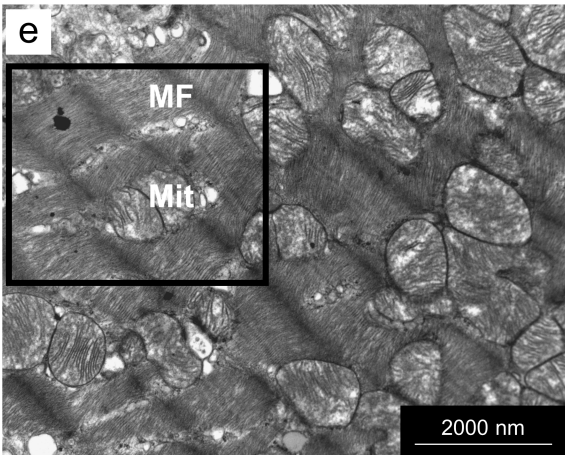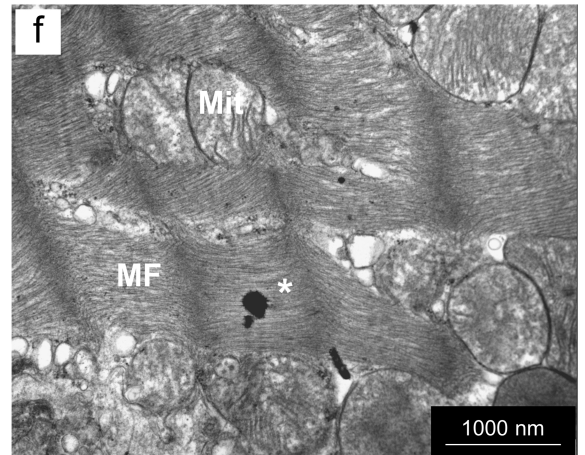

Supplement: 12989_2020_396_MOESM1_ESM.pdf [file 12989_2020_396_MOESM1_ESM.pdf]
